# Supplementary material for: Prospective Association Between Inflammatory Markers and Progression of Coronary Artery Calcification in Adults With and Without Type 1 Diabetes
Source: Oxford University Press journal article supplement (doi:10.2337/dc12-1874), 2013-01-23
Supplement: dc121874supplementarydata.pdf [file dc121874supplementarydata.pdf]

SUPPLEMENTARY DATA

**Supplementary Table 1.** Marker Assay Detection Limits and Standards

| Assay     | Method          | Manufacturer      | Catalog #   | Min Detectable | Max Detectable | Range of Standard   | Inter-Assay CV Range |
|-----------|-----------------|-------------------|-------------|----------------|----------------|---------------------|----------------------|
| IL-6      | Multiplex Panel | BioRad            | *           | 0.12           | 2065.8         | 516.45 - 0.03 pg/mL | 7.72% to 9.88%       |
| IL-6sR    | Elisa           | R&D Systems       | DR600       | 3125           | 200000         | 2000-31.25 pg/mL    | 11.98% to 15.63%     |
| TNF-a     | Cytokine Panel  | Millipore/Linco   | HCYTO 60K   | 0.128          | 10000          | 10000-0.128 pg/mL   | 18.9% to 23%         |
| TNF-a RII | Elisa           | R&D Systems       | DRT200      | 78.1           | 5000           | 500 - 7.81 pg/mL    | 6.22% to 13.10%      |
| sIL2r     | Elisa           | R&D Systems       | DR2A00      | 312.5          | 20000          | 5000 - 78.125 pg/mL | 7.09% to 9.70%       |
| sIL1ra    | Cytokine Panel  | Millipore/Linco   | HCYTO 60K   | 0.128          | 10000          | 10000-0.128 pg/mL   | 5.73% to 10.95%      |
| ICAM-1    | Elisa           | R&D Systems       | BBE1B       | 44.6           | 905.2          | 45.26 - 2.23 ng/mL  | 4.05% to 5.60%       |
| Pselectin | Elisa           | R&D Systems       | BBE6        | 23             | 1022           | 51.1 - 1.15 ng/mL   | 5.94% to 7.99%       |
| OPG       | Elisa           | Alpco Diagnostics | 04-BI-20402 | 0.37           | 30             | 30 - 0.37 pmol/L    | 6.76% to 7.04%       |
| IL-18     | Elisa           | MBL (R&D)         | 7620        | 125            | 5000           | 1000-25 pg/mL       | 10.05% to 12.27%     |
| MMP-3     | Elisa           | R&D Systems       | DMP300      | 1.56           | 100            | 10 - 0.156 ng/mL    | 4.88% to 10.37%      |
